# Supplementary material for: Multimarker Risk Stratification in Patients With Acute Myocardial Infarction
Source: PubMed Central journal article supplement — J Am Heart Assoc. 2016 May 20;5(5):e002586. doi: 10.1161/JAHA.115.002586 (PMC4889163; doi:10.1161/jaha.115.002586), 2016-05-20
Supplement: JAH3-5-e002586-s001.pdf [file JAH3-5-e002586-s001.pdf]

**SUPPLEMENTAL MATERIAL**

**Table S1:** Baseline characteristics for patients in the biomarker substudy of CLARITY-TIMI 28.

| <b>Variable</b>                                         |                    |
|---------------------------------------------------------|--------------------|
| Number                                                  | 1250               |
| Gender (male), %                                        | 79.4%              |
| Age (years), median (25th, 75th percentile)             | 58 (50, 67)        |
| Weight (kg), median (25th, 75th percentile)             | 80 (70, 89)        |
| BMI, median (25th, 75th percentile)                     | 27.1 (24.8, 30.1)  |
| History hypertension, %                                 | 39.4               |
| History hyperlipidemia, %                               | 40.8               |
| History diabetes, %                                     | 17.4               |
| History CHF, %                                          | 1.3                |
| Current tobacco use, %                                  | 47.3               |
| Prior MI, %                                             | 8.4                |
| Prior PCI, %                                            | 4.6                |
| Anterior MI, %                                          | 37.5               |
| CrCl, median (25th, 75th percentile)                    | 86.9 (70.2, 106.7) |
| Sx onset to lytic (hrs), median (25th, 75th percentile) | 2.5 (1.7, 3.8)     |
| Killip class 2-4, %                                     | 7.0                |
| Fibrin-specific lytic, %                                | 86.7               |
| Initial heparin type, %                                 |                    |
| None, %                                                 | 7.0                |
| UFH, %                                                  | 44.9               |
| LMWH, %                                                 | 43.4               |
| Both, %                                                 | 4.7                |
| Angiography performed during index hospitalization, %   | 96.0               |

**Table S2:** Baseline characteristics by NT-proBNP quartile at baseline

| <b>Variable</b>                                       | <b>Q1</b> | <b>Q2</b> | <b>Q3</b>  | <b>Q4</b> | <b>p-value (trend)</b> |
|-------------------------------------------------------|-----------|-----------|------------|-----------|------------------------|
| Number                                                | 313       | 312       | 312        | 312       |                        |
| Ranges (pg/ml)                                        | < 36.4    | 36.4-93.8 | 93.8-282.4 | >282.4    |                        |
| Gender (male), %                                      | 88.8      | 83.3      | 76.6       | 68.9      | <0.001                 |
| Age (years), median                                   | 51        | 56        | 62         | 65        | <0.001                 |
| Weight (kg), median                                   | 80.0      | 80.0      | 80.0       | 78.0      | 0.03                   |
| BMI, median                                           | 27.1      | 26.8      | 27.5       | 27.1      | 0.44                   |
| History hypertension, %                               | 31.1      | 30.4      | 44.2       | 51.6      | <0.001                 |
| History hyperlipidemia, %                             | 44.5      | 42.4      | 41.7       | 34.1      | 0.02                   |
| History diabetes, %                                   | 13.9      | 15.9      | 15.4       | 24.4      | 0.001                  |
| History CHF, %                                        | 0.0       | 0.3       | 1.0        | 3.9       | <0.001                 |
| Current tobacco use, %                                | 54.5      | 49.7      | 43.5       | 41.7      | <0.001                 |
| Prior MI, %                                           | 7.1       | 5.8       | 8.4        | 12.5      | 0.007                  |
| Prior PCI, %                                          | 5.1       | 3.8       | 3.5        | 5.8       | 0.75                   |
| Anterior MI, %                                        | 31.9      | 34.0      | 36.5       | 47.8      | <0.001                 |
| CrCl, median                                          | 93.2      | 92.5      | 84.8       | 76.6      | <0.001                 |
| Sx onset to lytic (hrs), median                       | 2.0       | 2.3       | 2.6        | 3.6       | <0.001                 |
| Killip class 2-4, %                                   | 2.6       | 6.8       | 5.5        | 13.2      | <0.001                 |
| Fibrin-specific lytic, %                              | 89.5      | 87.2      | 88.1       | 82.1      | 0.01                   |
| Initial heparin type, %                               |           |           |            |           |                        |
| None, %                                               | 6.1       | 5.4       | 7.1        | 9.3       | 0.30                   |
| UFH, %                                                | 41.2      | 42.9      | 50.3       | 44.9      |                        |
| LMWH, %                                               | 47.3      | 47.8      | 37.8       | 41.0      |                        |
| Both, %                                               | 5.4       | 3.8       | 4.8        | 4.8       |                        |
| Angiography performed during index hospitalization, % | 98.1      | 98.1      | 97.1       | 90.7      | <0.001                 |

**Table S3:** Baseline characteristics by quartile of ANP at baseline

| <b>Variable</b>                                  | <b>Q1</b> | <b>Q2</b>  | <b>Q3</b>     | <b>Q4</b> | <b>p-value (trend)</b> |
|--------------------------------------------------|-----------|------------|---------------|-----------|------------------------|
| Number                                           | 281       | 280        | 280           | 280       |                        |
| Ranges (pmol/L)                                  | < 56.2    | 56.2-108.7 | 108.7 - 181.7 | >181.7    |                        |
| Gender (male) , %                                | 86.1      | 82.9       | 78.2          | 72.1      | <0.001                 |
| Age (years), median                              | 54        | 55         | 59            | 65.5      | <0.001                 |
| Weight (kg), median                              | 84.0      | 80.0       | 80.0          | 77.0      | <0.001                 |
| BMI, median                                      | 27.9      | 27.0       | 27.0          | 26.6      | <0.001                 |
| History hypertension, %                          | 40.0      | 36.5       | 36.9          | 44.2      | 0.32                   |
| History hyperlipidemia, %                        | 41.6      | 43.4       | 41.7          | 36.9      | 0.27                   |
| History diabetes, %                              | 18.3      | 16.7       | 17.6          | 18.0      | 0.995                  |
| History CHF, %                                   | 0.4       | 0.7        | 1.1           | 3.3       | 0.003                  |
| Current tobacco use, %                           | 53.4      | 51.3       | 43.0          | 42.1      | 0.002                  |
| Prior MI, %                                      | 6.8       | 10.0       | 6.1           | 10.4      | 0.35                   |
| Prior PCI, %                                     | 4.6       | 5.0        | 2.5           | 6.5       | 0.60                   |
| Anterior MI, %                                   | 29.9      | 36.4       | 37.9          | 48.2      | <0.001                 |
| CrCl, median                                     | 96.1      | 95.9       | 85.9          | 74.1      | <0.001                 |
| Sx onset to lytic (hrs), median                  | 2.3       | 2.5        | 2.6           | 2.8       | 0.06                   |
| Killip class 2-4, %                              | 3.9       | 4.7        | 7.9           | 11.5      | <0.001                 |
| Fibrin-specific lytic, %                         | 82.2      | 91.1       | 87.1          | 85.0      | 0.62                   |
| Initial Heparin Type, %                          |           |            |               |           |                        |
| None, %                                          | 12.1      | 5.0        | 5.0           | 6.8       | 0.12                   |
| UFH, %                                           | 43.4      | 50.4       | 40.4          | 45.4      |                        |
| LMWH, %                                          | 40.6      | 39.6       | 51.4          | 41.4      |                        |
| Both, %                                          | 3.9       | 5.0        | 3.2           | 6.4       |                        |
| Angiography performed during index hospitalizati | 95.0      | 98.6       | 96.8          | 92.5      | 0.08                   |

**Table S4:** Baseline characteristics by ST2 quartile at baseline

| <b>Variable</b>                                       | <b>Q1</b> | <b>Q2</b>      | <b>Q3</b>     | <b>Q4</b> | <b>p-value<br/>(trend)</b> |
|-------------------------------------------------------|-----------|----------------|---------------|-----------|----------------------------|
| Number                                                | 367       | 259            | 305           | 308       |                            |
| Ranges (ng/ml)                                        | < 0.004   | 0.004-<br>0.08 | 0.08-<br>0.33 | > 0.33    |                            |
| Gender (male), %                                      | 79.8      | 80.7           | 80.3          | 77.3      | 0.45                       |
| Age (years), median                                   | 57        | 58             | 59            | 59        | 0.06                       |
| Weight (kg), median                                   | 80.0      | 80.0           | 79.8          | 79.8      | 0.07                       |
| BMI, median                                           | 27.4      | 27.2           | 26.8          | 27.0      | 0.42                       |
| History hypertension, %                               | 35.9      | 37.4           | 43.7          | 40.8      | 0.08                       |
| History hyperlipidemia, %                             | 39.3      | 44.4           | 42.3          | 38.3      | 0.81                       |
| History diabetes, %                                   | 9.9       | 18.9           | 20.5          | 21.9      | <0.001                     |
| History CHF, %                                        | 1.7       | 1.5            | 0.7           | 1.0       | 0.28                       |
| Current tobacco use, %                                | 50.4      | 44.8           | 47.4          | 45.8      | 0.31                       |
| Prior MI, %                                           | 8.5       | 9.3            | 9.2           | 6.9       | 0.51                       |
| Prior PCI, %                                          | 5.4       | 6.2            | 3.0           | 3.9       | 0.14                       |
| Anterior MI, %                                        | 34.1      | 37.8           | 36.4          | 42.9      | 0.03                       |
| CrCl, median                                          | 90.8      | 88.0           | 86.0          | 83.5      | 0.002                      |
| Sx onset to lytic (hrs), median                       | 2.3       | 2.4            | 2.7           | 2.7       | <0.001                     |
| Killip class 2-4, %                                   | 6.3       | 3.9            | 8.9           | 8.8       | 0.07                       |
| Fibrin-specific lytic, %                              | 91.0      | 86.5           | 83.9          | 84.1      | 0.004                      |
| Initial heparin type, %                               |           |                |               |           |                            |
| None, %                                               | 4.4       | 7.7            | 6.6           | 10.1      | 0.11                       |
| UFH, %                                                | 42.8      | 46.7           | 47.2          | 43.5      |                            |
| LMWH, %                                               | 46.6      | 42.9           | 42.6          | 41.2      |                            |
| Both, %                                               | 6.3       | 2.7            | 3.6           | 5.2       |                            |
| Angiography performed during index hospitalization, % | 96.7      | 97.3           | 95.4          | 94.5      | 0.09                       |

**Table S5:** Baseline characteristics by Galectin-3 quartile at baseline

| <b>Variable</b>                                       | <b>Q1</b> | <b>Q2</b> | <b>Q3</b> | <b>Q4</b> | <b>p-value (trend)</b> |
|-------------------------------------------------------|-----------|-----------|-----------|-----------|------------------------|
| Number                                                | 260       | 257       | 259       | 258       |                        |
| Ranges                                                | < 11.7    | 11.7-14.3 | 14.3-18.0 | > 18.0    |                        |
| Gender (male) , %                                     | 85.4      | 80.9      | 81.1      | 70.5      | <0.001                 |
| Age (years), median                                   | 56        | 56        | 60        | 63        | <0.001                 |
| Weight (kg), median                                   | 80.0      | 80.0      | 80.0      | 80.0      | 0.48                   |
| BMI, median                                           | 27.2      | 26.8      | 26.8      | 27.7      | 0.20                   |
| History hypertension, %                               | 31.9      | 34.6      | 40.7      | 47.8      | <0.001                 |
| History hyperlipidemia, %                             | 41.4      | 41.4      | 42.4      | 37.8      | 0.50                   |
| History diabetes, %                                   | 13.8      | 15.4      | 19.1      | 20.4      | 0.03                   |
| History CHF, %                                        | 0.8       | 0.8       | 1.2       | 2.3       | 0.10                   |
| Current tobacco use, %                                | 48.5      | 51.0      | 46.1      | 42.0      | 0.08                   |
| Prior MI, %                                           | 8.9       | 8.2       | 7.0       | 7.8       | 0.55                   |
| Prior PCI, %                                          | 6.5       | 5.8       | 3.1       | 2.7       | 0.01                   |
| Anterior MI, %                                        | 36.5      | 37.0      | 34.4      | 43.4      | 0.18                   |
| CrCl, median                                          | 97.0      | 92.4      | 82.4      | 76.3      | <0.001                 |
| Sx onset to lytic (hrs), median                       | 2.4       | 2.3       | 2.5       | 2.8       | 0.001                  |
| Killip class 2-4, %                                   | 6.2       | 7.4       | 5.0       | 10.9      | 0.10                   |
| Fibrin-specific lytic, %                              | 88.8      | 85.2      | 88.4      | 82.9      | 0.13                   |
| Initial heparin type, %                               |           |           |           |           |                        |
| None, %                                               | 8.1       | 9.3       | 4.2       | 5.8       | 0.87                   |
| UFH, %                                                | 39.2      | 43.2      | 48.3      | 47.3      |                        |
| LMWH, %                                               | 48.5      | 42.4      | 43.6      | 41.5      |                        |
| Both, %                                               | 4.2       | 5.1       | 3.9       | 5.4       |                        |
| Angiography performed during index hospitalization, % | 97.7      | 96.5      | 94.6      | 94.2      | 0.03                   |

**Table S6:** Baseline characteristics by MR-pro ADM quartile at baseline

| <b>Variable</b>                                       | <b>Q1</b> | <b>Q2</b> | <b>Q3</b> | <b>Q4</b> | <b>p-value (trend)</b> |
|-------------------------------------------------------|-----------|-----------|-----------|-----------|------------------------|
| Number                                                | 282       | 281       | 282       | 281       |                        |
| Ranges (nmol/L)                                       | < 0.13    | 0.13-0.47 | 0.47-0.62 | >0.62     |                        |
| Gender (male) , %                                     | 83.3      | 81.5      | 82.3      | 72.2      | 0.002                  |
| Age (years), median                                   | 59        | 54        | 56        | 65        | <0.001                 |
| Weight (kg), median                                   | 81.0      | 78.0      | 80.0      | 80.0      | 0.63                   |
| BMI, median                                           | 27.2      | 26.8      | 27.0      | 27.7      | 0.44                   |
| History hypertension, %                               | 39.9      | 32.0      | 33.2      | 51.6      | 0.006                  |
| History hyperlipidemia, %                             | 36.5      | 41.4      | 43.5      | 41.9      | 0.18                   |
| History diabetes, %                                   | 17.4      | 11.9      | 17.2      | 24.5      | 0.01                   |
| History CHF, %                                        | 1.1       | 0.0       | 0.7       | 3.6       | 0.007                  |
| Current tobacco use, %                                | 45.9      | 50.4      | 53.2      | 40.6      | 0.32                   |
| Prior MI, %                                           | 7.5       | 7.1       | 7.9       | 10.8      | 0.15                   |
| Prior PCI, %                                          | 3.9       | 2.8       | 7.1       | 4.6       | 0.25                   |
| Anterior MI, %                                        | 32.3      | 33.5      | 42.6      | 44.8      | <0.001                 |
| CrCl, median                                          | 86.3      | 96.5      | 91.8      | 76.1      | <0.001                 |
| Sx onset to lytic (hrs), median                       | 2.5       | 2.3       | 2.5       | 2.9       | <0.001                 |
| Killip class 2-4, %                                   | 4.6       | 6.1       | 6.4       | 10.4      | 0.01                   |
| Fibrin-specific lytic, %                              | 83.3      | 90.4      | 87.9      | 84.0      | 0.96                   |
| Initial heparin type, %                               |           |           |           |           |                        |
| None, %                                               | 11.3      | 4.3       | 6.0       | 7.1       | 0.55                   |
| UFH, %                                                | 47.2      | 44.1      | 44.7      | 42.7      |                        |
| LMWH, %                                               | 37.9      | 45.2      | 44.3      | 46.6      |                        |
| Both, %                                               | 3.5       | 6.4       | 5.0       | 3.6       |                        |
| Angiography performed during index hospitalization, % | 94.3      | 96.1      | 98.2      | 94.3      | 0.70                   |

**Table S7:** Baseline characteristics by copeptin quartile at baseline

| <b>Variable</b>                                       | <b>Q1</b> | <b>Q2</b> | <b>Q3</b>  | <b>Q4</b> | <b>p-value (trend)</b> |
|-------------------------------------------------------|-----------|-----------|------------|-----------|------------------------|
| Copeptin                                              | 282       | 281       | 282        | 281       |                        |
| Ranges (pmol/L)                                       | < 24.4    | 24.4-71.2 | 71.2-160.4 | >160.4    |                        |
| Gender (male) , %                                     | 81.6      | 78.6      | 83.3       | 75.8      | 0.24                   |
| Age (years), median                                   | 57        | 58        | 58         | 61        | <0.001                 |
| Weight (kg), median                                   | 80.0      | 81.0      | 80.0       | 77.0      | <0.001                 |
| BMI, median                                           | 27.8      | 27.5      | 26.8       | 26.2      | <0.001                 |
| History hypertension, %                               | 37.9      | 40.5      | 39.1       | 39.0      | 0.87                   |
| History hyperlipidemia, %                             | 40.3      | 38.5      | 43.9       | 40.8      | 0.62                   |
| History diabetes, %                                   | 21.4      | 16.8      | 15.1       | 17.6      | 0.19                   |
| History CHF, %                                        | 1.4       | 1.4       | 1.4        | 1.1       | 0.73                   |
| Current tobacco use, %                                | 51.2      | 46.3      | 50.7       | 42.5      | 0.10                   |
| Prior MI, %                                           | 6.8       | 11.7      | 7.8        | 7.1       | 0.69                   |
| Prior PCI, %                                          | 6.0       | 5.3       | 3.5        | 3.6       | 0.10                   |
| Anterior MI, %                                        | 42.2      | 38.4      | 33.3       | 38.8      | 0.24                   |
| CrCl, median                                          | 95.5      | 91.1      | 87.1       | 77.1      | <0.001                 |
| Sx onset to lytic (hrs), median                       | 3.2       | 2.7       | 2.4        | 2.0       | <0.001                 |
| Killip class 2-4, %                                   | 6.0       | 5.7       | 7.5        | 8.6       | 0.17                   |
| Fibrin-specific lytic, %                              | 85.8      | 88.3      | 85.8       | 86.5      | 0.96                   |
| Initial heparin type, %                               |           |           |            |           |                        |
| None, %                                               | 7.8       | 6.0       | 7.4        | 7.1       | 0.89                   |
| UFH, %                                                | 42.9      | 47.7      | 42.9       | 46.3      |                        |
| LMWH, %                                               | 46.1      | 40.9      | 45.7       | 40.6      |                        |
| Both, %                                               | 3.2       | 5.3       | 3.9        | 6.0       |                        |
| Angiography performed during index hospitalization, % | 96.1      | 97.2      | 95.0       | 94.7      | 0.23                   |



**Table S8:** Baseline characteristics by MPO quartile at baseline

| <b>Variable</b>                                       | <b>Q1</b> | <b>Q2</b> | <b>Q3</b>  | <b>Q4</b> | <b>p-value (trend)</b> |
|-------------------------------------------------------|-----------|-----------|------------|-----------|------------------------|
| Number                                                | 262       | 261       | 261        | 261       |                        |
| Ranges (ng/ml)                                        | < 29.4    | 29.4-91.8 | 91.8-301.4 | >301.4    |                        |
| Gender (male) , %                                     | 78.2      | 78.9      | 81.2       | 80.5      | 0.42                   |
| Age (years), median                                   | 57        | 59        | 59         | 59        | 0.24                   |
| Weight (kg), median                                   | 79.7      | 80.0      | 80.0       | 80.0      | 0.44                   |
| BMI, median                                           | 26.8      | 26.8      | 27.0       | 27.4      | 0.30                   |
| History hypertension, %                               | 31.9      | 39.7      | 37.3       | 45.4      | 0.005                  |
| History hyperlipidemia, %                             | 37.1      | 41.6      | 44.3       | 39.8      | 0.46                   |
| History diabetes, %                                   | 14.6      | 20.7      | 16.9       | 16.3      | 0.89                   |
| History CHF, %                                        | 0.8       | 1.9       | 1.1        | 1.2       | 0.90                   |
| Current tobacco use, %                                | 45.4      | 48.7      | 46.4       | 47.5      | 0.78                   |
| Prior MI, %                                           | 8.8       | 9.2       | 6.9        | 6.9       | 0.28                   |
| Prior PCI, %                                          | 6.1       | 5.4       | 3.4        | 3.1       | 0.054                  |
| Anterior MI, %                                        | 38.5      | 37.9      | 38.3       | 36.0      | 0.59                   |
| CrCl, median                                          | 93.3      | 83.3      | 87.6       | 84.7      | 0.06                   |
| Sx onset to lytic (hrs), median                       | 2.4       | 2.5       | 2.5        | 2.5       | 0.08                   |
| Killip class 2-4, %                                   | 4.6       | 9.6       | 10.0       | 5.4       | 0.71                   |
| Fibrin-specific lytic, %                              | 86.3      | 82.4      | 87.0       | 90.4      | 0.07                   |
| Initial heparin type, %                               |           |           |            |           |                        |
| None, %                                               | 8.0       | 10.3      | 6.5        | 2.3       | 0.34                   |
| UFH, %                                                | 40.1      | 38.3      | 34.1       | 67.0      |                        |
| LMWH, %                                               | 48.5      | 49.0      | 53.6       | 23.4      |                        |
| Both, %                                               | 3.4       | 2.3       | 5.7        | 7.3       |                        |
| Angiography performed during index hospitalization, % | 97.7      | 95.0      | 94.3       | 96.2      | 0.33                   |

**Table S9:** Baseline characteristics by hsCRP quartile at baseline

| <b>Variable</b>                                       | <b>Q1</b> | <b>Q2</b> | <b>Q3</b> | <b>Q4</b> | <b>p-value (trend)</b> |
|-------------------------------------------------------|-----------|-----------|-----------|-----------|------------------------|
| Number                                                | 318       | 307       | 313       | 312       |                        |
| Ranges (mg/L)                                         | < 1.3     | 1.3-2.8   | 2.8-6.1   | > 6.1     |                        |
| Gender (male) , %                                     | 80.5      | 88.3      | 77.0      | 72.1      | <0.001                 |
| Age (years), median                                   | 56        | 59        | 57        | 61        | 0.001                  |
| Weight (kg), median                                   | 77.0      | 80.0      | 80.0      | 80.0      | <0.001                 |
| BMI, median                                           | 26.1      | 26.8      | 27.6      | 28.0      | <0.001                 |
| History hypertension, %                               | 33.4      | 40.2      | 36.3      | 47.7      | 0.002                  |
| History hyperlipidemia, %                             | 40.8      | 39.8      | 42.4      | 39.9      | 0.99                   |
| History diabetes, %                                   | 13.2      | 13.8      | 18.8      | 23.6      | <0.001                 |
| History CHF, %                                        | 0.3       | 0.7       | 1.3       | 2.9       | 0.003                  |
| Current tobacco use, %                                | 40.7      | 46.9      | 54.5      | 47.3      | 0.03                   |
| Prior MI, %                                           | 9.8       | 6.5       | 8.7       | 8.7       | 0.86                   |
| Prior PCI, %                                          | 6.6       | 2.9       | 4.2       | 4.5       | 0.32                   |
| Anterior MI, %                                        | 39.0      | 35.8      | 36.1      | 39.1      | 0.97                   |
| CrCl, median                                          | 85.6      | 87.1      | 89.1      | 84.9      | 0.57                   |
| Sx onset to lytic (hrs), median                       | 2.3       | 2.4       | 2.4       | 3.0       | <0.001                 |
| Killip class 2-4, %                                   | 5.0       | 4.9       | 7.3       | 10.6      | 0.003                  |
| Fibrin-specific lytic, %                              | 87.4      | 88.3      | 86.9      | 84.3      | 0.21                   |
| Initial heparin type, %                               |           |           |           |           |                        |
| None, %                                               | 6.3       | 5.9       | 6.7       | 9.0       | 0.91                   |
| UFH, %                                                | 45.9      | 46.3      | 44.1      | 43.3      |                        |
| LMWH, %                                               | 43.7      | 43.6      | 43.8      | 42.6      |                        |
| Both, %                                               | 4.1       | 4.2       | 5.4       | 5.1       |                        |
| Angiography performed during index hospitalization, % | 96.9      | 97.7      | 96.5      | 92.9      | 0.009                  |

**Table S10:** Baseline characteristics by PAPP-A quartile at baseline

| <b>Variable</b>                                       | <b>Q1</b> | <b>Q2</b> | <b>Q3</b> | <b>Q4</b> | <b>p-value (trend)</b> |
|-------------------------------------------------------|-----------|-----------|-----------|-----------|------------------------|
| Number                                                | 219       | 219       | 219       | 219       |                        |
| Ranges                                                | < 2.4     | 2.4-4.4   | 4.4-16.2  | > 16.2    |                        |
| Gender (male) , %                                     | 68.5      | 80.4      | 84.9      | 82.6      | <0.001                 |
| Age (years), median                                   | 57        | 58        | 57        | 60        | 0.25                   |
| Weight (kg), median                                   | 77.7      | 80.0      | 81.0      | 79.0      | 0.28                   |
| BMI, median                                           | 26.7      | 27.1      | 27.4      | 26.5      | 0.81                   |
| History hypertension, %                               | 39.6      | 36.1      | 43.5      | 37.8      | 0.90                   |
| History hyperlipidemia, %                             | 45.8      | 34.4      | 40.7      | 38.1      | 0.28                   |
| History diabetes, %                                   | 18.1      | 15.7      | 19.6      | 13.5      | 0.39                   |
| History CHF, %                                        | 0.5       | 0.9       | 0.9       | 1.4       | 0.34                   |
| Current tobacco use, %                                | 52.1      | 51.1      | 42.0      | 44.5      | 0.04                   |
| Prior MI, %                                           | 6.9       | 7.3       | 9.2       | 7.8       | 0.59                   |
| Prior PCI, %                                          | 1.8       | 4.1       | 6.4       | 3.2       | 0.27                   |
| Anterior MI, %                                        | 33.3      | 47.5      | 42.5      | 33.8      | 0.80                   |
| CrCl, median                                          | 86.3      | 89.3      | 88.8      | 83.4      | 0.87                   |
| Sx onset to lytic (hrs), median                       | 2.5       | 2.5       | 2.5       | 2.3       | 0.25                   |
| Killip class 2-4, %                                   | 5.9       | 7.3       | 5.0       | 6.0       | 0.76                   |
| Fibrin-specific lytic, %                              | 85.8      | 79.9      | 87.7      | 95.0      | <0.001                 |
| Initial Heparin type, %                               |           |           |           |           |                        |
| None, %                                               | 8.2       | 9.6       | 7.3       | 0.5       | 0.02                   |
| UFH, %                                                | 46.6      | 38.8      | 43.8      | 49.3      |                        |
| LMWH, %                                               | 42.0      | 48.9      | 40.6      | 45.7      |                        |
| Both, %                                               | 3.2       | 2.7       | 8.2       | 4.6       |                        |
| Angiography performed during index hospitalization, % | 95.9      | 96.8      | 96.3      | 95.0      | 0.59                   |

**Table S11:** Baseline characteristics by GDF-15 quartile at baseline among

| <b>Variable</b>                                       | <b>Q1</b> | <b>Q2</b>     | <b>Q3</b>    | <b>Q4</b> | <b>p-value (trend)</b> |
|-------------------------------------------------------|-----------|---------------|--------------|-----------|------------------------|
| Number                                                | 278       | 278           | 278          | 277       |                        |
| Ranges (pg/ml)                                        | <539.6    | 539.6 - 784.3 | 784.3-1243.9 | >1243.9   |                        |
| Gender (male) , %                                     | 86.7      | 79.9          | 74.5         | 76.5      | <0.001                 |
| Age (years), median                                   | 55.5      | 58            | 60           | 61        | <0.001                 |
| Weight (kg), median                                   | 81.0      | 80.0          | 79.8         | 80.0      | 0.06                   |
| BMI, median                                           | 27.3      | 27.0          | 26.7         | 26.9      | 0.97                   |
| History hypertension, %                               | 33.0      | 40.6          | 39.2         | 45.1      | 0.008                  |
| History hyperlipidemia, %                             | 44.3      | 45.0          | 39.4         | 33.9      | 0.009                  |
| History diabetes, %                                   | 11.2      | 17.2          | 18.6         | 24.6      | <0.001                 |
| History CHF, %                                        | 0.4       | 1.4           | 1.4          | 1.8       | 0.14                   |
| Current tobacco use, %                                | 47.1      | 48.9          | 48.9         | 43.7      | 0.44                   |
| Prior MI, %                                           | 7.6       | 9.1           | 7.2          | 9.8       | 0.52                   |
| Prior PCI, %                                          | 5.0       | 4.0           | 4.3          | 4.0       | 0.61                   |
| Anterior MI, %                                        | 37.8      | 39.2          | 41.7         | 33.6      | 0.44                   |
| CrCl, median                                          | 97.7      | 88.5          | 83.3         | 75.9      | <0.001                 |
| Sx onset to lytic (hrs), median                       | 2.3       | 2.4           | 2.5          | 2.7       | <0.001                 |
| Killip class 2-4, %                                   | 7.2       | 6.9           | 7.2          | 6.9       | 0.92                   |
| Fibrin-specific lytic, %                              | 91.4      | 88.5          | 86.3         | 80.5      | <0.001                 |
| Initial heparin type, %                               |           |               |              |           |                        |
| None, %                                               | 5.4       | 6.5           | 4.3          | 10.8      | 0.53                   |
| UFH, %                                                | 54.3      | 43.2          | 43.9         | 42.2      |                        |
| LMWH, %                                               | 37.4      | 47.1          | 45.0         | 41.2      |                        |
| Both, %                                               | 2.9       | 3.2           | 6.8          | 5.8       |                        |
| Angiography performed during index hospitalization, % | 98.2      | 96.4          | 96.0         | 92.1      | <0.001                 |

**Table S12:** Baseline characteristics by troponin T quantile at baseline

| <b>Variable</b>                                       | <b>Undetectable<br/>TnT</b> | <b>TnT Tertile 1<br/>(if detectable)</b> | <b>TnT Tertile 2<br/>(if detectable)</b> | <b>TnT Tertile 3<br/>(if detectable)</b> | <b>p-value<br/>(trend)</b> |
|-------------------------------------------------------|-----------------------------|------------------------------------------|------------------------------------------|------------------------------------------|----------------------------|
| Number                                                | 594                         | 219                                      | 219                                      | 218                                      |                            |
| Ranges (ng/ml)                                        | <0.01                       | 0.01-0.06                                | 0.06-0.25                                | >0.25                                    |                            |
| Gender (male) , %                                     | 81.0                        | 80.4                                     | 78.1                                     | 75.7                                     | 0.09                       |
| Age (years), median                                   | 56                          | 59                                       | 60                                       | 62                                       | <0.001                     |
| Weight (kg), median                                   | 80.0                        | 80.0                                     | 80.0                                     | 78.5                                     | 0.32                       |
| BMI, median                                           | 27.1                        | 27.1                                     | 27.3                                     | 26.8                                     | 0.70                       |
| History hypertension, %                               | 35.7                        | 35.9                                     | 45.2                                     | 47.2                                     | <0.001                     |
| History hyperlipidemia, %                             | 45.0                        | 36.3                                     | 42.7                                     | 31.0                                     | 0.003                      |
| History diabetes, %                                   | 15.6                        | 16.9                                     | 15.7                                     | 24.3                                     | 0.02                       |
| History CHF, %                                        | 0.8                         | 0.9                                      | 1.4                                      | 2.8                                      | 0.05                       |
| Current tobacco use, %                                | 50.4                        | 44.3                                     | 46.8                                     | 42.4                                     | 0.05                       |
| Prior MI, %                                           | 10.0                        | 6.8                                      | 7.8                                      | 6.5                                      | 0.10                       |
| Prior PCI, %                                          | 5.9                         | 4.6                                      | 3.7                                      | 1.8                                      | 0.01                       |
| Anterior MI, %                                        | 27.4                        | 41.1                                     | 48.4                                     | 50.5                                     | <0.001                     |
| CrCl, median                                          | 88.9                        | 91.5                                     | 84.5                                     | 79.8                                     | <0.001                     |
| Sx onset to lytic (hrs), median                       | 2.0                         | 2.5                                      | 3.2                                      | 4.0                                      | <0.001                     |
| Killip class 2-4, %                                   | 5.7                         | 6.0                                      | 5.5                                      | 12.8                                     | 0.005                      |
| Fibrin-specific lytic, %                              | 87.5                        | 90.9                                     | 86.8                                     | 80.3                                     | 0.02                       |
| Initial Heparin type, %                               |                             |                                          |                                          |                                          |                            |
| None, %                                               | 7.1                         | 4.1                                      | 9.1                                      | 7.3                                      | 0.95                       |
| UFH, %                                                | 42.9                        | 53.0                                     | 47.9                                     | 39.0                                     |                            |
| LMWH, %                                               | 44.6                        | 39.3                                     | 39.3                                     | 48.6                                     |                            |
| Both, %                                               | 5.4                         | 3.7                                      | 3.7                                      | 5.0                                      |                            |
| Angiography performed during index hospitalization, % | 97.6                        | 98.6                                     | 96.3                                     | 88.5                                     | <0.001                     |

**Table S13:** The association between each candidate marker individually and the odds of CV death at 30 days after multivariable adjustment.

|                                              | <b>Biomarker</b>      | <b>OR (95% CI) adjusted for clinical factors</b> | <b>P value</b> |
|----------------------------------------------|-----------------------|--------------------------------------------------|----------------|
| <b>Myocardial stress/ structural changes</b> | NT-proBNP             | 2.92 (1.45-5.90)                                 | 0.003          |
|                                              | MR-pro ANP            | 2.22 (1.10-4.49)                                 | 0.03           |
|                                              | ST-2                  | 2.63 (1.36-5.09)                                 | 0.004          |
|                                              | Galectin-3            | 1.68 (0.83-3.42)                                 | 0.15           |
|                                              | MR-pro adrenomedullin | 1.12 (0.55-2.28)                                 | 0.75           |
|                                              | Copeptin              | 1.49 (0.74-3.02)                                 | 0.26           |
| <b>Myo-necrosis</b>                          | Troponin T (T1-T2)*   | 3.85 (1.47-10.1)                                 | 0.006          |
|                                              | Troponin T (T3)*      | 6.72 (2.51-18.0)                                 | <0.001         |
| <b>Inflammation</b>                          | MPO                   | 7.15 (1.60-32.0)                                 | 0.01           |
|                                              | hsCRP                 | 2.38 (1.23-4.61)                                 | 0.01           |
|                                              | PAPP-A                | 2.85 (0.86-9.46)                                 | 0.09           |
|                                              | GDF-15                | 1.01 (0.38-2.68)                                 | 0.99           |

All markers modeled quartile 4:quartile 1-3 except MPO, GDF-15 and PAPP-A (quartile 2-4:quartile 1). Multivariable model included age, sex, prior HF, diabetes mellitus, prior MI, systolic blood pressure, heart rate, Killip class II-IV, type of lytic, anterior STEMI, creatinine clearance <60ml/min, time to lytic, treatment arm. \*Troponin T coded as 3-way variable with undetectable troponin T as referent and detectable troponin T coded by tertile (T).

**Table S14:** The association between each candidate marker individually and the odds of heart failure at 30 days after multivariable adjustment.

|                                                  | <b>Biomarker</b>      | <b>OR (95% CI) adjusted for clinical factors</b> | <b>P value</b> |
|--------------------------------------------------|-----------------------|--------------------------------------------------|----------------|
| <b>Myocardial stress/<br/>Structural changes</b> | NT-proBNP             | 1.75 (0.83-3.71)                                 | 0.14           |
|                                                  | MR-pro ANP            | 1.72 (0.81-3.64)                                 | 0.16           |
|                                                  | ST-2                  | 2.68 (1.35-5.36)                                 | 0.005          |
|                                                  | Galectin-3            | 2.22 (1.04-4.71)                                 | 0.04           |
|                                                  | MR-pro adrenomedullin | 0.95 (0.43-2.08)                                 | 0.90           |
|                                                  | Copeptin              | 0.89 (0.40-1.98)                                 | 0.77           |
| <b>Myo-necrosis</b>                              | Troponin T (T1-T2)*   | 1.50 (0.63-3.55)                                 | 0.36           |
|                                                  | Troponin T (T3)*      | 1.92 (0.76-4.88)                                 | 0.17           |
| <b>Inflammation</b>                              | MPO                   | 1.08 (0.44-2.65)                                 | 0.86           |
|                                                  | hsCRP                 | 1.44 (0.70-2.96)                                 | 0.32           |
|                                                  | PAPP-A                | 2.57 (0.72-9.21)                                 | 0.15           |
|                                                  | GDF-15                | 0.69 (0.30-1.60)                                 | 0.39           |

All markers modeled quartile 4:quartile 1-3 except MPO, GDF-15 and PAPP-A (quartile 2-4:quartile 1). Multivariable model included age, sex, prior HF, diabetes mellitus, prior MI, systolic blood pressure, heart rate, Killip class II-IV, anterior STEMI, type of lytic, creatinine clearance <60ml/min, time to lytic, treatment arm. \*Troponin T coded as 3-way variable with undetectable troponin T as referent and detectable troponin T coded by tertile (T).

**Table S15:** The association between each candidate marker individually and the odds of MI at 30 days after multivariable adjustment.

|                                                  | <b>Biomarker</b>      | <b>OR (95% CI) adjusted for clinical factors</b> | <b>P value</b> |
|--------------------------------------------------|-----------------------|--------------------------------------------------|----------------|
| <b>Myocardial stress/<br/>Structural changes</b> | NT-proBNP             | 0.66 (0.32-1.35)                                 | 0.25           |
|                                                  | MR-pro ANP            | 1.09 (0.58-2.03)                                 | 0.79           |
|                                                  | ST-2                  | 1.70 (1.01-2.86)                                 | 0.046          |
|                                                  | Galectin-3            | 1.02 (0.55-1.92)                                 | 0.94           |
|                                                  | MR-pro adrenomedullin | 0.85 (0.43-1.67)                                 | 0.64           |
|                                                  | Copeptin              | 1.89 (1.08-3.30)                                 | 0.03           |
| <b>Myo-necrosis</b>                              | Troponin T (T1-T2)*   | 0.75 (0.43-1.31)                                 | 0.31           |
|                                                  | Troponin T (T3)*      | 0.57 (0.22-1.43)                                 | 0.23           |
| <b>Inflammation</b>                              | MPO                   | 1.00 (0.56-1.77)                                 | 0.99           |
|                                                  | hsCRP                 | 0.67 (0.35-1.29)                                 | 0.23           |
|                                                  | PAPP-A                | 1.04 (0.51-2.11)                                 | 0.91           |
|                                                  | GDF-15                | 0.32 (0.19-0.54)                                 | <0.001         |

All markers modeled quartile 4:quartile 1-3 except MPO, GDF-15 and PAPP-A (quartile 2-4:quartile 1). Multivariable model included age, sex, prior HF, diabetes mellitus, prior MI, systolic blood pressure, heart rate, Killip class II-IV, anterior STEMI, type of lytic, creatinine clearance <60ml/min, time to lytic, treatment arm. \*Troponin T coded as 3-way variable with undetectable troponin T as referent and detectable troponin T coded by tertile (T).



**Table S16:** The association between each candidate marker individually and the odds of recurrent ischemia requiring urgent revascularization at 30 days after multivariable adjustment.

|                                                  | <b>Biomarker</b>      | <b>OR (95% CI) adjusted for clinical factors</b> | <b>P value</b> |
|--------------------------------------------------|-----------------------|--------------------------------------------------|----------------|
| <b>Myocardial stress/<br/>Structural changes</b> | NT-proBNP             | 0.61 (0.28-1.31)                                 | 0.20           |
|                                                  | MR-pro ANP            | 1.28 (0.63-2.59)                                 | 0.50           |
|                                                  | ST-2                  | 1.38 (0.75-2.52)                                 | 0.30           |
|                                                  | Galectin-3            | 0.66 (0.29-1.49)                                 | 0.31           |
|                                                  | MR-pro adrenomedullin | 1.22 (0.59-2.49)                                 | 0.59           |
|                                                  | Copeptin              | 0.59 (0.26-1.32)                                 | 0.20           |
| <b>Myo-necrosis</b>                              | Troponin T (T1-T2)*   | 1.49 (0.80-2.76)                                 | 0.21           |
|                                                  | Troponin T (T3)*      | 0.69 (0.25-1.88)                                 | 0.47           |
| <b>Inflammation</b>                              | MPO                   | 1.01 (0.50-2.01)                                 | 0.99           |
|                                                  | hsCRP                 | 1.10 (0.58-2.08)                                 | 0.77           |
|                                                  | PAPP-A                | 1.40 (0.59-3.33)                                 | 0.44           |
|                                                  | GDF-15                | 0.42 (0.22-0.80)                                 | 0.009          |

All markers modeled quartile 4:quartile 1-3 except MPO, GDF-15 and PAPP-A (quartile 2-4:quartile 1). Multivariable model included age, sex, prior HF, diabetes mellitus, prior MI, systolic blood pressure, heart rate, Killip class II-IV, anterior STEMI, type of lytic, creatinine clearance <60ml/min, time to lytic, treatment arm. \*Troponin T coded as 3-way variable with undetectable troponin T as referent and detectable troponin T coded by tertile (T).

**Table S17:** The association between each candidate marker individually and the odds of TIMI flow grade 0 or 1 at angiography after multivariable adjustment.

|                                                  | <b>Biomarker</b>      | <b>OR (95% CI) adjusted for clinical factors</b> | <b>P value</b> |
|--------------------------------------------------|-----------------------|--------------------------------------------------|----------------|
| <b>Myocardial stress/<br/>Structural changes</b> | NT-proBNP             | 1.27 (0.82-1.96)                                 | 0.29           |
|                                                  | MR-pro ANP            | 1.16 (0.73-1.85)                                 | 0.53           |
|                                                  | ST-2                  | 1.72 (1.18-2.50)                                 | 0.006          |
|                                                  | Galectin-3            | 1.03 (0.65-1.64)                                 | 0.89           |
|                                                  | MR-pro adrenomedullin | 0.97 (0.61-1.56)                                 | 0.91           |
|                                                  | Copeptin              | 1.55 (1.01-2.39)                                 | 0.045          |
| <b>Myo-necrosis</b>                              | Troponin T (T1-T2)*   | 1.08 (0.71-1.61)                                 | 0.73           |
|                                                  | Troponin T (T3)*      | 1.52 (0.88-2.56)                                 | 0.13           |
| <b>Inflammation</b>                              | MPO                   | 1.45 (0.90-2.33)                                 | 0.12           |
|                                                  | hsCRP                 | 1.41 (0.94-2.08)                                 | 0.10           |
|                                                  | PAPP-A                | 1.47 (0.81-2.70)                                 | 0.21           |
|                                                  | GDF-15                | 0.41 (0.27-0.62)                                 | <0.001         |

All markers modeled quartile 4:quartile 1-3 except MPO, GDF-15 and PAPP-A (quartile 2-4:quartile 1). Multivariable model included age, sex, prior HF, diabetes mellitus, prior MI, systolic blood pressure, heart rate, Killip class II-IV, anterior STEMI, type of lytic, creatinine clearance <60ml/min, time to lytic, treatment arm. \*Troponin T coded as 3-way variable with undetectable troponin T as referent and detectable troponin T coded by tertile (T).

**Table S18:** The association between ST2, troponin T and MPO and the odds of CV death or HF at 30 days after multivariable adjustment including left ventricular ejection fraction (LVEF) in the 515 subjects in whom LVEF was available.

| <b>Biomarker</b>         | <b>OR (95% CI) adjusted for clinical factors</b> |
|--------------------------|--------------------------------------------------|
| ST2                      | 4.60 (1.69-12.5)                                 |
| Troponin T (Tertile 1-2) | 5.28 (1.21-23.0)                                 |
| Troponin T (Tertile 3)   | 8.14 (1.74-38..0)                                |
| MPO                      | 2.01 (0.53-7.67)                                 |

\*Troponin T coded as 3-way variable with undetectable troponin T as referent and detectable troponin T coded by tertile (T).
